# Supplementary material for: Empirical Modeling of COVID-19 Evolution with High/Direct Impact on Public Health and Risk Assessment
Source: MDPI journal article supplement (doi:10.3390/ijerph19063707), 2022-03-20
Supplement: s1 [file s1]

# Supplementary Materials

## Empirical Modeling of COVID-19 Evolution with High/Direct Impact on Public Health and Risk Assessment

Noureddine Ouerfelli<sup>1</sup>, Narcisa Vranceanu<sup>2\*</sup>, Diana Coman<sup>2</sup> and Adriana Lavinia Cioca<sup>3</sup>

<sup>1</sup> Institut Supérieur des Technologies Médicales de Tunis, Laboratoire de Biophysique et Technologies Médicales, Université de Tunis El Manar, Tunis , 1006, Tunisia; nouerfelli@yahoo.fr

<sup>2</sup> Department of Industrial Machinery and Equipment, Lucian Blaga University of Sibiu, 10 Victoriei Boulevard , 550024 Sibiu, Romania; diana.coman@ulbsibiu.ro

<sup>3</sup> Independent researcher, CMI Dr. Cioca Adriana-Lavinia , 22 Dorobantilor Street , Sibiu, 557260 Sibiu, Romania; adriana.cioca@gmail.com

\* Correspondence: vranceanu.narcisai@ulbsibiu.ro; Tel.: +40-721-428-641

### 1S. Data Collection

We have collected data from electronic sources [A,B,C], for about 440 days for Romania (from February 25, 2020 to May 09, 2021).

[A] COVID-19 dashboard, Center for Systems Science and Engineering (CSSE), Johns Hopkins University (JHU) 2020. <https://systems.jhu.edu/>

[B] COVID-19 Coronavirus Pandemic, <https://www.worldometers.info/coronavirus/>

[C] Github, Our World in Data, <https://github.com/owid/covid-19-data/tree/master/public/data>  
<https://gisanddata.maps.arcgis.com/apps/opsdashboard/index.html#/bda7594740fd40299423467b48e9ecf6>  
<https://www.statista.com/statistics/1102614/romania.coronavirus.cases/>

**Table S1.**Data of Reported cases and deaths of Covid-19 for Romania for about twenty-one months (from February 25, 2020 to Dec.11, 2021).

| Date       | Time (t).d | Total cases | New cases | Total deaths | New deaths | Date       | Time (t).d | Total cases | New cases | Total deaths | New deaths |
|------------|------------|-------------|-----------|--------------|------------|------------|------------|-------------|-----------|--------------|------------|
| 24.02.2020 | 0          | 0           | 0         | 0            | 0          | 2021.01.18 | 328        | 695153      | 1509      | 17271        | 50         |
| 25.02.2020 | 0          | 0           | 0         | 0            | 0          | 2021.01.19 | 329        | 697898      | 2745      | 17369        | 98         |
| 26.02.2020 | 1          | 1           | 1         | 0            | 0          | 2021.01.20 | 330        | 700898      | 3000      | 17485        | 116        |
| 27.02.2020 | 2          | 1           | 0         | 0            | 0          | 2021.01.21 | 331        | 703776      | 2878      | 17554        | 69         |
| 28.02.2020 | 3          | 3           | 2         | 0            | 0          | 2021.01.22 | 332        | 706475      | 2699      | 17628        | 74         |
| 29.02.2020 | 4          | 3           | 0         | 0            | 0          | 2021.01.23 | 333        | 709194      | 2719      | 17722        | 94         |
| 01.03.2020 | 5          | 3           | 0         | 0            | 0          | 2021.01.24 | 334        | 711010      | 1816      | 17776        | 54         |
| 02.03.2020 | 6          | 3           | 0         | 0            | 0          | 2021.01.25 | 335        | 712561      | 1551      | 17841        | 65         |
| 03.03.2020 | 7          | 3           | 0         | 0            | 0          | 2021.01.26 | 336        | 715438      | 2877      | 17938        | 97         |
| 04.03.2020 | 8          | 4           | 1         | 0            | 0          | 2021.01.27 | 337        | 718612      | 3174      | 18015        | 77         |
| 05.03.2020 | 9          | 6           | 2         | 0            | 0          | 2021.01.28 | 338        | 721513      | 2901      | 18105        | 90         |
| 06.03.2020 | 10         | 9           | 3         | 0            | 0          | 2021.01.29 | 339        | 724250      | 2737      | 18196        | 91         |
| 07.03.2020 | 11         | 9           | 0         | 0            | 0          | 2021.01.30 | 340        | 726918      | 2668      | 18264        | 68         |
| 08.03.2020 | 12         | 15          | 6         | 0            | 0          | 2021.01.31 | 341        | 728743      | 1825      | 18335        | 71         |
| 09.03.2020 | 13         | 15          | 0         | 0            | 0          | 2021.02.01 | 342        | 730056      | 1313      | 18402        | 67         |
| 10.03.2020 | 14         | 25          | 10        | 0            | 0          | 2021.02.02 | 343        | 732732      | 2676      | 18513        | 111        |
| 11.03.2020 | 15         | 45          | 20        | 0            | 0          | 2021.02.03 | 344        | 735484      | 2752      | 18600        | 87         |
| 12.03.2020 | 16         | 49          | 4         | 0            | 0          | 2021.02.04 | 345        | 738152      | 2668      | 18675        | 75         |
| 13.03.2020 | 17         | 89          | 40        | 0            | 0          | 2021.02.05 | 346        | 740732      | 2580      | 18748        | 73         |
| 14.03.2020 | 18         | 123         | 34        | 0            | 0          | 2021.02.06 | 347        | 743343      | 2611      | 18809        | 61         |
| 15.03.2020 | 19         | 131         | 8         | 0            | 0          | 2021.02.07 | 348        | 745318      | 1975      | 18881        | 72         |

|            |    |       |     |     |    |            |      |        |      |       |     |
|------------|----|-------|-----|-----|----|------------|------|--------|------|-------|-----|
| 16.03.2020 | 20 | 158   | 27  | 0   | 0  | 2021.02.08 | 349  | 746637 | 1319 | 18961 | 80  |
| 17.03.2020 | 21 | 184   | 26  | 0   | 0  | 2021.02.09 | 350  | 749434 | 2797 | 19056 | 95  |
| 18.03.2020 | 22 | 260   | 76  | 0   | 0  | 2021.02.10 | 351  | 752482 | 3048 | 19135 | 79  |
| 19.03.2020 | 23 | 277   | 17  | 0   | 0  | 2021.02.11 | 352  | 755126 | 2644 | 19200 | 65  |
| 20.03.2020 | 24 | 308   | 31  | 0   | 0  | 2021.02.12 | 353  | 757676 | 2550 | 19277 | 77  |
| 21.03.2020 | 25 | 367   | 59  | 0   | 0  | 2021.02.13 | 354  | 760091 | 2415 | 19325 | 48  |
| 22.03.2020 | 26 | 433   | 66  | 3   | 3  | 2021.02.14 | 355  | 761963 | 1872 | 19366 | 41  |
| 23.03.2020 | 27 | 576   | 143 | 7   | 4  | 2021.02.15 | 356  | 763294 | 1331 | 19445 | 79  |
| 24.03.2020 | 28 | 794   | 218 | 11  | 4  | 2021.02.16 | 357  | 765970 | 2676 | 19526 | 81  |
| 25.03.2020 | 29 | 906   | 112 | 17  | 6  | 2021.02.17 | 358  | 768785 | 2815 | 19588 | 62  |
| 26.03.2020 | 30 | 1029  | 123 | 23  | 6  | 2021.02.18 | 359  | 771843 | 3058 | 19659 | 71  |
| 27.03.2020 | 31 | 1292  | 263 | 26  | 3  | 2021.02.19 | 360  | 774555 | 2712 | 19738 | 79  |
| 28.03.2020 | 32 | 1452  | 160 | 37  | 11 | 2021.02.20 | 361  | 777276 | 2721 | 19795 | 57  |
| 29.03.2020 | 33 | 1815  | 363 | 43  | 6  | 2021.02.21 | 362  | 779695 | 2419 | 19847 | 52  |
| 30.03.2020 | 34 | 2109  | 294 | 65  | 22 | 2021.02.22 | 363  | 781329 | 1634 | 19894 | 47  |
| 31.03.2020 | 35 | 2245  | 136 | 82  | 17 | 2021.02.23 | 364  | 784711 | 3382 | 20013 | 119 |
| 01.04.2020 | 36 | 2460  | 215 | 92  | 10 | 2021.02.24 | 365  | 788048 | 3337 | 20086 | 73  |
| 02.04.2020 | 37 | 2738  | 278 | 115 | 23 | 2021.02.25 | 366  | 791971 | 3923 | 20167 | 81  |
| 03.04.2020 | 38 | 3183  | 445 | 133 | 18 | 2021.02.26 | 367* | 795732 | 3761 | 20233 | 66  |
| 04.04.2020 | 39 | 3613  | 430 | 146 | 13 | 2021.02.27 | 368  | 799164 | 3432 | 20287 | 54  |
| 05.04.2020 | 40 | 3864  | 251 | 151 | 5  | 2021.02.28 | 369  | 801994 | 2830 | 20350 | 63  |
| 06.04.2020 | 41 | 4057  | 193 | 176 | 25 | 2021.03.01 | 370  | 804090 | 2096 | 20403 | 53  |
| 07.04.2020 | 42 | 4417  | 360 | 197 | 21 | 2021.03.02 | 371  | 808040 | 3950 | 20509 | 106 |
| 08.04.2020 | 43 | 4761  | 344 | 220 | 23 | 2021.03.03 | 372  | 812318 | 4278 | 20586 | 77  |
| 09.04.2020 | 44 | 5202  | 441 | 248 | 28 | 2021.03.04 | 373  | 816589 | 4271 | 20684 | 98  |
| 10.04.2020 | 45 | 5467  | 265 | 270 | 22 | 2021.03.05 | 374  | 820931 | 4342 | 20785 | 101 |
| 11.04.2020 | 46 | 5990  | 523 | 291 | 21 | 2021.03.06 | 375  | 824995 | 4064 | 20854 | 69  |
| 12.04.2020 | 47 | 6300  | 310 | 316 | 25 | 2021.03.07 | 376  | 828283 | 3288 | 20900 | 46  |
| 13.04.2020 | 48 | 6633  | 333 | 331 | 15 | 2021.03.08 | 377  | 830563 | 2280 | 20963 | 63  |
| 14.04.2020 | 49 | 6879  | 246 | 351 | 20 | 2021.03.09 | 378  | 835552 | 4989 | 21056 | 93  |
| 15.04.2020 | 50 | 7216  | 337 | 372 | 21 | 2021.03.10 | 379  | 840116 | 4564 | 21156 | 100 |
| 16.04.2020 | 51 | 7707  | 491 | 392 | 20 | 2021.03.11 | 380  | 845352 | 5236 | 21252 | 96  |
| 17.04.2020 | 52 | 8067  | 360 | 411 | 19 | 2021.03.12 | 381  | 850362 | 5010 | 21360 | 108 |
| 18.04.2020 | 53 | 8418  | 351 | 421 | 10 | 2021.03.13 | 382  | 855326 | 4964 | 21439 | 79  |
| 19.04.2020 | 54 | 8746  | 328 | 451 | 30 | 2021.03.14 | 383  | 859709 | 4383 | 21483 | 44  |
| 20.04.2020 | 55 | 8936  | 190 | 478 | 27 | 2021.03.15 | 384  | 862681 | 2972 | 21565 | 82  |
| 21.04.2020 | 56 | 9242  | 306 | 498 | 20 | 2021.03.16 | 385  | 868799 | 6118 | 21698 | 133 |
| 22.04.2020 | 57 | 9710  | 468 | 524 | 26 | 2021.03.17 | 386  | 874985 | 6186 | 21787 | 89  |
| 23.04.2020 | 58 | 10096 | 386 | 545 | 21 | 2021.03.18 | 387  | 881159 | 6174 | 21877 | 90  |
| 24.04.2020 | 59 | 10417 | 321 | 567 | 22 | 2021.03.19 | 388  | 886752 | 5593 | 22020 | 143 |
| 25.04.2020 | 60 | 10635 | 218 | 601 | 34 | 2021.03.20 | 389  | 892848 | 6096 | 22132 | 112 |
| 26.04.2020 | 61 | 11036 | 401 | 619 | 18 | 2021.03.21 | 390  | 897115 | 4267 | 22208 | 76  |
| 27.04.2020 | 62 | 11339 | 303 | 641 | 22 | 2021.03.22 | 391  | 900858 | 3743 | 22268 | 60  |
| 28.04.2020 | 63 | 11616 | 277 | 663 | 22 | 2021.03.23 | 392  | 907007 | 6149 | 22442 | 174 |
| 29.04.2020 | 64 | 11978 | 362 | 693 | 30 | 2021.03.24 | 393  | 913143 | 6136 | 22579 | 137 |
| 30.04.2020 | 65 | 12240 | 262 | 717 | 24 | 2021.03.25 | 394  | 919794 | 6651 | 22719 | 140 |
| 01.05.2020 | 66 | 12567 | 327 | 744 | 27 | 2021.03.26 | 395  | 926310 | 6516 | 22835 | 116 |
| 02.05.2020 | 67 | 12732 | 165 | 771 | 27 | 2021.03.27 | 396  | 932179 | 5869 | 22997 | 162 |
| 03.05.2020 | 68 | 13163 | 431 | 790 | 19 | 2021.03.28 | 397  | 936618 | 4439 | 23114 | 117 |
| 04.05.2020 | 69 | 13512 | 349 | 818 | 28 | 2021.03.29 | 398  | 940443 | 3825 | 23234 | 120 |
| 05.05.2020 | 70 | 13837 | 325 | 841 | 23 | 2021.03.30 | 399  | 946647 | 6204 | 23409 | 175 |
| 06.05.2020 | 71 | 14107 | 270 | 864 | 23 | 2021.03.31 | 400  | 952803 | 6156 | 23538 | 129 |
| 07.05.2020 | 72 | 14499 | 392 | 888 | 24 | 2021.04.01 | 401  | 958918 | 6115 | 23674 | 136 |
| 08.05.2020 | 73 | 14811 | 312 | 923 | 35 | 2021.04.02 | 402  | 964726 | 5808 | 23819 | 145 |
| 09.05.2020 | 74 | 15131 | 320 | 939 | 16 | 2021.04.03 | 403  | 970224 | 5498 | 23973 | 154 |
| 10.05.2020 | 75 | 15362 | 231 | 961 | 22 | 2021.04.04 | 404  | 974375 | 4151 | 24070 | 97  |
| 11.05.2020 | 76 | 15588 | 226 | 982 | 21 | 2021.04.05 | 405  | 977986 | 3611 | 24190 | 120 |

|            |     |       |     |      |    |            |     |         |      |       |     |
|------------|-----|-------|-----|------|----|------------|-----|---------|------|-------|-----|
| 12.05.2020 | 77  | 15778 | 190 | 1002 | 20 | 2021.04.06 | 406 | 983217  | 5231 | 24386 | 196 |
| 13.05.2020 | 78  | 16002 | 224 | 1036 | 34 | 2021.04.07 | 407 | 988624  | 5407 | 24561 | 175 |
| 14.05.2020 | 79  | 16247 | 245 | 1053 | 17 | 2021.04.08 | 408 | 993613  | 4989 | 24733 | 172 |
| 15.05.2020 | 80  | 16437 | 190 | 1070 | 17 | 2021.04.09 | 409 | 998555  | 4942 | 24867 | 134 |
| 16.05.2020 | 81  | 16704 | 267 | 1094 | 24 | 2021.04.10 | 410 | 1002865 | 4310 | 25006 | 139 |
| 17.05.2020 | 82  | 16871 | 167 | 1107 | 13 | 2021.04.11 | 411 | 1006167 | 3302 | 25135 | 129 |
| 18.05.2020 | 83  | 17036 | 165 | 1120 | 13 | 2021.04.12 | 412 | 1008490 | 2323 | 25248 | 113 |
| 19.05.2020 | 84  | 17191 | 155 | 1137 | 17 | 2021.04.13 | 413 | 1012373 | 3883 | 25441 | 193 |
| 20.05.2020 | 85  | 17387 | 196 | 1147 | 10 | 2021.04.14 | 414 | 1016449 | 4076 | 25605 | 164 |
| 21.05.2020 | 86  | 17585 | 198 | 1156 | 9  | 2021.04.15 | 415 | 1020301 | 3852 | 25800 | 195 |
| 22.05.2020 | 87  | 17712 | 127 | 1166 | 10 | 2021.04.16 | 416 | 1023565 | 3264 | 25937 | 137 |
| 23.05.2020 | 88  | 17857 | 145 | 1176 | 10 | 2021.04.17 | 417 | 1027039 | 3474 | 26072 | 135 |
| 24.05.2020 | 89  | 18070 | 213 | 1185 | 9  | 2021.04.18 | 418 | 1029304 | 2265 | 26232 | 160 |
| 25.05.2020 | 90  | 18283 | 213 | 1205 | 20 | 2021.04.19 | 419 | 1031072 | 1768 | 26381 | 149 |
| 26.05.2020 | 91  | 18429 | 146 | 1216 | 11 | 2021.04.20 | 420 | 1034003 | 2931 | 26618 | 237 |
| 27.05.2020 | 92  | 18594 | 165 | 1227 | 11 | 2021.04.21 | 421 | 1037009 | 3006 | 26793 | 175 |
| 28.05.2020 | 93  | 18791 | 197 | 1235 | 8  | 2021.04.22 | 422 | 1039998 | 2989 | 26943 | 150 |
| 29.05.2020 | 94  | 18982 | 191 | 1248 | 13 | 2021.04.23 | 423 | 1042521 | 2523 | 27113 | 170 |
| 30.05.2020 | 95  | 19133 | 151 | 1259 | 11 | 2021.04.24 | 424 | 1044722 | 2201 | 27267 | 154 |
| 31.05.2020 | 96  | 19257 | 124 | 1266 | 7  | 2021.04.25 | 425 | 1046264 | 1542 | 27394 | 127 |
| 01.06.2020 | 97  | 19398 | 141 | 1276 | 10 | 2021.04.26 | 426 | 1047520 | 1256 | 27511 | 117 |
| 02.06.2020 | 98  | 19517 | 119 | 1288 | 12 | 2021.04.27 | 427 | 1049539 | 2019 | 27683 | 172 |
| 03.06.2020 | 99  | 19669 | 152 | 1296 | 8  | 2021.04.28 | 428 | 1051779 | 2240 | 27833 | 150 |
| 04.06.2020 | 100 | 19907 | 238 | 1305 | 9  | 2021.04.29 | 429 | 1053629 | 1850 | 27971 | 138 |
| 05.06.2020 | 101 | 20103 | 196 | 1316 | 11 | 2021.04.30 | 430 | 1055265 | 1636 | 28109 | 138 |
| 06.06.2020 | 102 | 20290 | 187 | 1322 | 6  | 2021.05.01 | 431 | 1056572 | 1307 | 28194 | 85  |
| 07.06.2020 | 103 | 20479 | 189 | 1333 | 11 | 2021.05.02 | 432 | 1057655 | 1083 | 28282 | 88  |
| 08.06.2020 | 104 | 20604 | 125 | 1339 | 6  | 2021.05.03 | 433 | 1058337 | 682  | 28380 | 98  |
| 09.06.2020 | 105 | 20749 | 145 | 1354 | 15 | 2021.05.04 | 434 | 1059331 | 994  | 28474 | 94  |
| 10.06.2020 | 106 | 20945 | 196 | 1360 | 6  | 2021.05.05 | 435 | 1060895 | 1564 | 28616 | 142 |
| 11.06.2020 | 107 | 21182 | 237 | 1369 | 9  | 2021.05.06 | 436 | 1062527 | 1632 | 28710 | 94  |
| 12.06.2020 | 108 | 21404 | 222 | 1380 | 11 | 2021.05.07 | 437 | 1063949 | 1422 | 28799 | 89  |
| 13.06.2020 | 109 | 21679 | 275 | 1394 | 14 | 2021.05.08 | 438 | 1065254 | 1305 | 28903 | 104 |
| 14.06.2020 | 110 | 21999 | 320 | 1410 | 16 | 2021.05.09 | 439 | 1066111 | 857  | 28966 | 63  |
| 15.06.2020 | 111 | 22165 | 166 | 1427 | 17 | 2021.05.10 | 440 | 1066731 | 620  | 29034 | 68  |
| 16.06.2020 | 112 | 22415 | 250 | 1437 | 10 | 2021.05.11 | 441 | 1067887 | 1156 | 29135 | 101 |
| 17.06.2020 | 113 | 22760 | 345 | 1451 | 14 | 2021.05.12 | 442 | 1068817 | 930  | 29233 | 98  |
| 18.06.2020 | 114 | 23080 | 320 | 1473 | 22 | 2021.05.13 | 443 | 1069770 | 953  | 29308 | 75  |
| 19.06.2020 | 115 | 23400 | 320 | 1484 | 11 | 2021.05.14 | 444 | 1070605 | 835  | 29413 | 105 |
| 20.06.2020 | 116 | 23730 | 330 | 1500 | 16 | 2021.05.15 | 445 | 1071334 | 729  | 29485 | 72  |
| 21.06.2020 | 117 | 24045 | 315 | 1512 | 12 | 2021.05.16 | 446 | 1071899 | 565  | 29523 | 38  |
| 22.06.2020 | 118 | 24291 | 246 | 1523 | 11 | 2021.05.17 | 447 | 1072291 | 392  | 29571 | 48  |
| 23.06.2020 | 119 | 24505 | 214 | 1539 | 16 | 2021.05.18 | 448 | 1072972 | 681  | 29662 | 91  |
| 24.06.2020 | 120 | 24826 | 321 | 1555 | 16 | 2021.05.19 | 449 | 1073679 | 707  | 29716 | 54  |
| 25.06.2020 | 121 | 25286 | 460 | 1565 | 10 | 2021.05.20 | 450 | 1074297 | 618  | 29777 | 61  |
| 26.06.2020 | 122 | 25697 | 411 | 1579 | 14 | 2021.05.21 | 451 | 1074781 | 484  | 29826 | 49  |
| 27.06.2020 | 123 | 26022 | 325 | 1589 | 10 | 2021.05.22 | 452 | 1075236 | 455  | 29885 | 59  |
| 28.06.2020 | 124 | 26313 | 291 | 1612 | 23 | 2021.05.23 | 453 | 1075543 | 307  | 29941 | 56  |
| 2020.06.29 | 125 | 26582 | 269 | 1634 | 22 | 2021.05.24 | 454 | 1075773 | 230  | 29977 | 36  |
| 2020.06.30 | 126 | 26970 | 388 | 1651 | 17 | 2021.05.25 | 455 | 1076154 | 381  | 30040 | 63  |
| 2020.07.01 | 127 | 27296 | 326 | 1667 | 16 | 2021.05.26 | 456 | 1076533 | 379  | 30092 | 52  |
| 2020.07.02 | 128 | 27746 | 450 | 1687 | 20 | 2021.05.27 | 457 | 1076840 | 307  | 30131 | 39  |
| 2020.07.03 | 129 | 28166 | 420 | 1708 | 21 | 2021.05.28 | 458 | 1077161 | 321  | 30174 | 43  |
| 2020.07.04 | 130 | 28582 | 416 | 1731 | 23 | 2021.05.29 | 459 | 1077426 | 265  | 30247 | 73  |
| 2020.07.05 | 131 | 28973 | 391 | 1750 | 19 | 2021.05.30 | 460 | 1077584 | 158  | 30276 | 29  |
| 2020.07.06 | 132 | 29223 | 250 | 1768 | 18 | 2021.05.31 | 461 | 1077737 | 153  | 30312 | 36  |
| 2020.07.07 | 133 | 29620 | 397 | 1799 | 31 | 2021.06.01 | 462 | 1077978 | 241  | 30353 | 41  |

|            |     |       |      |      |    |            |     |         |     |       |     |
|------------|-----|-------|------|------|----|------------|-----|---------|-----|-------|-----|
| 2020.07.08 | 134 | 30175 | 555  | 1817 | 18 | 2021.06.02 | 463 | 1078142 | 164 | 30415 | 62  |
| 2020.07.09 | 135 | 30789 | 614  | 1834 | 17 | 2021.06.03 | 464 | 1078338 | 196 | 30499 | 84  |
| 2020.07.10 | 136 | 31381 | 592  | 1847 | 13 | 2021.06.04 | 465 | 1078563 | 225 | 30612 | 113 |
| 2020.07.11 | 137 | 32079 | 698  | 1871 | 24 | 2021.06.05 | 466 | 1078742 | 179 | 30725 | 113 |
| 2020.07.12 | 138 | 32535 | 456  | 1884 | 13 | 2021.06.06 | 467 | 1078863 | 121 | 30815 | 90  |
| 2020.07.13 | 139 | 32948 | 413  | 1901 | 17 | 2021.06.07 | 468 | 1078952 | 89  | 30878 | 63  |
| 2020.07.14 | 140 | 33585 | 637  | 1931 | 30 | 2021.06.08 | 469 | 1079154 | 202 | 31155 | 277 |
| 2020.07.15 | 141 | 34226 | 641  | 1952 | 21 | 2021.06.09 | 470 | 1079294 | 140 | 31383 | 228 |
| 2020.07.16 | 142 | 35003 | 777  | 1971 | 19 | 2021.06.10 | 471 | 1079427 | 133 | 31531 | 148 |
| 2020.07.17 | 143 | 35802 | 799  | 1988 | 17 | 2021.06.11 | 472 | 1079530 | 103 | 31681 | 150 |
| 2020.07.18 | 144 | 36691 | 889  | 2009 | 21 | 2021.06.12 | 473 | 1079657 | 127 | 31804 | 123 |
| 2020.07.19 | 145 | 37458 | 767  | 2026 | 17 | 2021.06.13 | 474 | 1079726 | 69  | 31834 | 30  |
| 2020.07.20 | 146 | 38139 | 681  | 2038 | 12 | 2021.06.14 | 475 | 1079776 | 50  | 31861 | 27  |
| 2020.07.21 | 147 | 39133 | 994  | 2074 | 36 | 2021.06.15 | 476 | 1079879 | 103 | 31957 | 96  |
| 2020.07.22 | 148 | 40163 | 1030 | 2101 | 27 | 2021.06.16 | 477 | 1079983 | 104 | 32028 | 71  |
| 2020.07.23 | 149 | 41275 | 1112 | 2126 | 25 | 2021.06.17 | 478 | 1080070 | 87  | 32115 | 87  |
| 2020.07.24 | 150 | 42394 | 1119 | 2150 | 24 | 2021.06.18 | 479 | 1080140 | 70  | 32212 | 97  |
| 2020.07.25 | 151 | 43678 | 1284 | 2165 | 15 | 2021.06.19 | 480 | 1080203 | 63  | 32308 | 96  |
| 2020.07.26 | 152 | 44798 | 1120 | 2187 | 22 | 2021.06.20 | 481 | 1080256 | 53  | 32326 | 18  |
| 2020.07.27 | 153 | 45902 | 1104 | 2206 | 19 | 2021.06.21 | 482 | 1080282 | 26  | 32391 | 65  |
| 2020.07.28 | 154 | 47053 | 1151 | 2239 | 33 | 2021.06.22 | 483 | 1080323 | 41  | 32465 | 74  |
| 2020.07.29 | 155 | 48235 | 1182 | 2269 | 30 | 2021.06.23 | 484 | 1080389 | 66  | 32626 | 161 |
| 2020.07.30 | 156 | 49591 | 1356 | 2304 | 35 | 2021.06.24 | 485 | 1080457 | 68  | 32771 | 145 |
| 2020.07.31 | 157 | 50886 | 1295 | 2343 | 39 | 2021.06.25 | 486 | 1080522 | 65  | 32911 | 140 |
| 2020.08.01 | 158 | 52111 | 1225 | 2379 | 36 | 2021.06.26 | 487 | 1080584 | 62  | 33177 | 266 |
| 2020.08.02 | 159 | 53186 | 1075 | 2413 | 34 | 2021.06.27 | 488 | 1080630 | 46  | 33253 | 76  |
| 2020.08.03 | 160 | 54009 | 823  | 2432 | 19 | 2021.06.28 | 489 | 1080667 | 37  | 33311 | 58  |
| 2020.08.04 | 161 | 55241 | 1232 | 2480 | 48 | 2021.06.29 | 490 | 1080740 | 73  | 33605 | 294 |
| 2020.08.05 | 162 | 56550 | 1309 | 2521 | 41 | 2021.06.30 | 491 | 1080792 | 52  | 33786 | 181 |
| 2020.08.06 | 163 | 57895 | 1345 | 2566 | 45 | 2021.07.01 | 492 | 1080823 | 31  | 33861 | 75  |
| 2020.08.07 | 164 | 59273 | 1378 | 2616 | 50 | 2021.07.02 | 493 | 1080860 | 37  | 33898 | 37  |
| 2020.08.08 | 165 | 60623 | 1350 | 2659 | 43 | 2021.07.03 | 494 | 1080918 | 58  | 33925 | 27  |
| 2020.08.09 | 166 | 61768 | 1145 | 2700 | 41 | 2021.07.04 | 495 | 1080951 | 33  | 33928 | 3   |
| 2020.08.10 | 167 | 62547 | 779  | 2729 | 29 | 2021.07.05 | 496 | 1080979 | 28  | 33973 | 45  |
| 2020.08.11 | 168 | 63762 | 1215 | 2764 | 35 | 2021.07.06 | 497 | 1081030 | 51  | 34021 | 48  |
| 2020.08.12 | 169 | 65177 | 1415 | 2807 | 43 | 2021.07.07 | 498 | 1081090 | 60  | 34098 | 77  |
| 2020.08.13 | 170 | 66631 | 1454 | 2860 | 53 | 2021.07.08 | 499 | 1081120 | 30  | 34168 | 70  |
| 2020.08.14 | 171 | 68046 | 1415 | 2904 | 44 | 2021.07.09 | 500 | 1081174 | 54  | 34197 | 29  |
| 2020.08.15 | 172 | 69374 | 1328 | 2954 | 50 | 2021.07.10 | 501 | 1081210 | 36  | 34216 | 19  |
| 2020.08.16 | 173 | 70461 | 1087 | 2991 | 37 | 2021.07.11 | 502 | 1081236 | 26  | 34217 | 1   |
| 2020.08.17 | 174 | 71194 | 733  | 3029 | 38 | 2021.07.12 | 503 | 1081275 | 39  | 34219 | 2   |
| 2020.08.18 | 175 | 72208 | 1014 | 3074 | 45 | 2021.07.13 | 504 | 1081326 | 51  | 34233 | 14  |
| 2020.08.19 | 176 | 73617 | 1409 | 3106 | 32 | 2021.07.14 | 505 | 1081405 | 79  | 34242 | 9   |
| 2020.08.20 | 177 | 74963 | 1346 | 3154 | 48 | 2021.07.15 | 506 | 1081467 | 62  | 34245 | 3   |
| 2020.08.21 | 178 | 76355 | 1392 | 3196 | 42 | 2021.07.16 | 507 | 1081539 | 72  | 34250 | 5   |
| 2020.08.22 | 179 | 77544 | 1189 | 3233 | 37 | 2021.07.17 | 508 | 1081588 | 49  | 34252 | 2   |
| 2020.08.23 | 180 | 78505 | 961  | 3272 | 39 | 2021.07.18 | 509 | 1081632 | 44  | 34253 | 1   |
| 2020.08.24 | 181 | 79330 | 825  | 3309 | 37 | 2021.07.19 | 510 | 1081678 | 46  | 34254 | 1   |
| 2020.08.25 | 182 | 80390 | 1060 | 3367 | 58 | 2021.07.20 | 511 | 1081773 | 95  | 34258 | 4   |
| 2020.08.26 | 183 | 81646 | 1256 | 3421 | 54 | 2021.07.21 | 512 | 1081875 | 102 | 34260 | 2   |
| 2020.08.27 | 184 | 83150 | 1504 | 3459 | 38 | 2021.07.22 | 513 | 1081953 | 78  | 34264 | 4   |
| 2020.08.28 | 185 | 84468 | 1318 | 3507 | 48 | 2021.07.23 | 514 | 1082057 | 104 | 34266 | 2   |
| 2020.08.29 | 186 | 85833 | 1365 | 3539 | 32 | 2021.07.24 | 515 | 1082183 | 126 | 34267 | 1   |
| 2020.08.30 | 187 | 86785 | 952  | 3578 | 39 | 2021.07.25 | 516 | 1082292 | 109 | 34268 | 1   |
| 2020.08.31 | 188 | 87540 | 755  | 3621 | 43 | 2021.07.26 | 517 | 1082376 | 84  | 34270 | 2   |
| 2020.09.01 | 189 | 88593 | 1053 | 3681 | 60 | 2021.07.27 | 518 | 1082551 | 175 | 34273 | 3   |
| 2020.09.02 | 190 | 89891 | 1298 | 3721 | 40 | 2021.07.28 | 519 | 1082710 | 159 | 34274 | 1   |

|            |     |        |      |      |     |            |     |         |      |       |     |
|------------|-----|--------|------|------|-----|------------|-----|---------|------|-------|-----|
| 2020.09.03 | 191 | 91256  | 1365 | 3765 | 44  | 2021.07.29 | 520 | 1082880 | 170  | 34275 | 1   |
| 2020.09.04 | 192 | 92595  | 1339 | 3812 | 47  | 2021.07.30 | 521 | 1083033 | 153  | 34278 | 3   |
| 2020.09.05 | 193 | 93864  | 1269 | 3850 | 38  | 2021.07.31 | 522 | 1083189 | 156  | 34281 | 3   |
| 2020.09.06 | 194 | 95014  | 1150 | 3893 | 43  | 2021.08.01 | 523 | 1083341 | 152  | 34286 | 5   |
| 2020.09.07 | 195 | 95897  | 883  | 3926 | 33  | 2021.08.02 | 524 | 1083478 | 137  | 34291 | 5   |
| 2020.09.08 | 196 | 97033  | 1136 | 3967 | 41  | 2021.08.03 | 525 | 1083711 | 233  | 34297 | 6   |
| 2020.09.09 | 197 | 98304  | 1271 | 4018 | 51  | 2021.08.04 | 526 | 1083982 | 271  | 34298 | 1   |
| 2020.09.10 | 198 | 99684  | 1380 | 4065 | 47  | 2021.08.05 | 527 | 1084226 | 244  | 34300 | 2   |
| 2020.09.11 | 199 | 101075 | 1391 | 4100 | 35  | 2021.08.06 | 528 | 1084456 | 230  | 34305 | 5   |
| 2020.09.12 | 200 | 102386 | 1311 | 4127 | 27  | 2021.08.07 | 529 | 1084711 | 255  | 34313 | 8   |
| 2020.09.13 | 201 | 103495 | 1109 | 4163 | 36  | 2021.08.08 | 530 | 1084919 | 208  | 34316 | 3   |
| 2020.09.14 | 202 | 104187 | 692  | 4185 | 22  | 2021.08.09 | 531 | 1085100 | 181  | 34319 | 3   |
| 2020.09.15 | 203 | 105298 | 1111 | 4236 | 51  | 2021.08.10 | 532 | 1085412 | 312  | 34323 | 4   |
| 2020.09.16 | 204 | 107011 | 1713 | 4285 | 49  | 2021.08.11 | 533 | 1085738 | 326  | 34331 | 8   |
| 2020.09.17 | 205 | 108690 | 1679 | 4312 | 27  | 2021.08.12 | 534 | 1086109 | 371  | 34334 | 3   |
| 2020.09.18 | 206 | 110217 | 1527 | 4360 | 48  | 2021.08.13 | 535 | 1086492 | 383  | 34337 | 3   |
| 2020.09.19 | 207 | 111550 | 1333 | 4402 | 42  | 2021.08.14 | 536 | 1086900 | 408  | 34342 | 5   |
| 2020.09.20 | 208 | 112781 | 1231 | 4435 | 33  | 2021.08.15 | 537 | 1087223 | 323  | 34348 | 6   |
| 2020.09.21 | 209 | 113589 | 808  | 4458 | 23  | 2021.08.16 | 538 | 1087509 | 286  | 34353 | 5   |
| 2020.09.22 | 210 | 114648 | 1059 | 4503 | 45  | 2021.08.17 | 539 | 1088053 | 544  | 34359 | 6   |
| 2020.09.23 | 211 | 116415 | 1767 | 4550 | 47  | 2021.08.18 | 540 | 1088594 | 541  | 34365 | 6   |
| 2020.09.24 | 212 | 118054 | 1639 | 4591 | 41  | 2021.08.19 | 541 | 1089189 | 595  | 34379 | 14  |
| 2020.09.25 | 213 | 119683 | 1629 | 4633 | 42  | 2021.08.20 | 542 | 1089817 | 628  | 34388 | 9   |
| 2020.09.26 | 214 | 121235 | 1552 | 4687 | 54  | 2021.08.21 | 543 | 1090408 | 591  | 34403 | 15  |
| 2020.09.27 | 215 | 122673 | 1438 | 4718 | 31  | 2021.08.22 | 544 | 1090925 | 517  | 34412 | 9   |
| 2020.09.28 | 216 | 123944 | 1271 | 4748 | 30  | 2021.08.23 | 545 | 1091340 | 415  | 34425 | 13  |
| 2020.09.29 | 217 | 125414 | 1470 | 4792 | 44  | 2021.08.24 | 546 | 1092122 | 782  | 34439 | 14  |
| 2020.09.30 | 218 | 127572 | 2158 | 4825 | 33  | 2021.08.25 | 547 | 1092971 | 849  | 34453 | 14  |
| 2020.10.01 | 219 | 129658 | 2086 | 4862 | 37  | 2021.08.26 | 548 | 1093924 | 953  | 34471 | 18  |
| 2020.10.02 | 220 | 132001 | 2343 | 4915 | 53  | 2021.08.27 | 549 | 1094870 | 946  | 34490 | 19  |
| 2020.10.03 | 221 | 134065 | 2064 | 4947 | 32  | 2021.08.28 | 550 | 1095885 | 1015 | 34509 | 19  |
| 2020.10.04 | 222 | 135900 | 1835 | 5003 | 56  | 2021.08.29 | 551 | 1096753 | 868  | 34528 | 19  |
| 2020.10.05 | 223 | 137491 | 1591 | 5048 | 45  | 2021.08.30 | 552 | 1097452 | 699  | 34539 | 11  |
| 2020.10.06 | 224 | 139612 | 2121 | 5121 | 73  | 2021.08.31 | 553 | 1098765 | 1313 | 34570 | 31  |
| 2020.10.07 | 225 | 142570 | 2958 | 5203 | 82  | 2021.09.01 | 554 | 1100208 | 1443 | 34591 | 21  |
| 2020.10.08 | 226 | 145700 | 3130 | 5247 | 44  | 2021.09.02 | 555 | 1101678 | 1470 | 34617 | 26  |
| 2020.10.09 | 227 | 148886 | 3186 | 5299 | 52  | 2021.09.03 | 556 | 1103198 | 1520 | 34650 | 33  |
| 2020.10.10 | 228 | 152403 | 3517 | 5358 | 59  | 2021.09.04 | 557 | 1104766 | 1568 | 34678 | 28  |
| 2020.10.11 | 229 | 155283 | 2880 | 5411 | 53  | 2021.09.05 | 558 | 1106008 | 1242 | 34689 | 11  |
| 2020.10.12 | 230 | 157352 | 2069 | 5467 | 56  | 2021.09.06 | 559 | 1107043 | 1035 | 34714 | 25  |
| 2020.10.13 | 231 | 160461 | 3109 | 5535 | 68  | 2021.09.07 | 560 | 1109076 | 2033 | 34762 | 48  |
| 2020.10.14 | 232 | 164477 | 4016 | 5601 | 66  | 2021.09.08 | 561 | 1111155 | 2079 | 34792 | 30  |
| 2020.10.15 | 233 | 168490 | 4013 | 5674 | 73  | 2021.09.09 | 562 | 1113381 | 2226 | 34871 | 79  |
| 2020.10.16 | 234 | 172516 | 4026 | 5749 | 75  | 2021.09.10 | 563 | 1115901 | 2520 | 34914 | 43  |
| 2020.10.17 | 235 | 176468 | 3952 | 5812 | 63  | 2021.09.11 | 564 | 1118549 | 2648 | 34961 | 47  |
| 2020.10.18 | 236 | 180388 | 3920 | 5872 | 60  | 2021.09.12 | 565 | 1120804 | 2255 | 34990 | 29  |
| 2020.10.19 | 237 | 182854 | 2466 | 5931 | 59  | 2021.09.13 | 566 | 1122653 | 1849 | 35036 | 46  |
| 2020.10.20 | 238 | 186254 | 3400 | 5996 | 65  | 2021.09.14 | 567 | 1126582 | 3929 | 35132 | 96  |
| 2020.10.21 | 239 | 191102 | 4848 | 6065 | 69  | 2021.09.15 | 568 | 1130586 | 4004 | 35215 | 83  |
| 2020.10.22 | 240 | 196004 | 4902 | 6163 | 98  | 2021.09.16 | 569 | 1135027 | 4441 | 35286 | 71  |
| 2020.10.23 | 241 | 201032 | 5028 | 6245 | 82  | 2021.09.17 | 570 | 1139505 | 4478 | 35359 | 73  |
| 2020.10.24 | 242 | 205793 | 4761 | 6318 | 73  | 2021.09.18 | 571 | 1144893 | 5388 | 35456 | 97  |
| 2020.10.25 | 243 | 209648 | 3855 | 6391 | 73  | 2021.09.19 | 572 | 1148710 | 3817 | 35514 | 58  |
| 2020.10.26 | 244 | 212492 | 2844 | 6470 | 79  | 2021.09.20 | 573 | 1152052 | 3342 | 35592 | 78  |
| 2020.10.27 | 245 | 217216 | 4724 | 6574 | 104 | 2021.09.21 | 574 | 1158841 | 6789 | 35721 | 129 |
| 2020.10.28 | 246 | 222559 | 5343 | 6681 | 107 | 2021.09.22 | 575 | 1165886 | 7045 | 35851 | 130 |
| 2020.10.29 | 247 | 229040 | 6481 | 6764 | 83  | 2021.09.23 | 576 | 1172981 | 7095 | 35964 | 113 |

|            |     |        |       |       |     |            |     |         |       |       |     |
|------------|-----|--------|-------|-------|-----|------------|-----|---------|-------|-------|-----|
| 2020.10.30 | 248 | 235586 | 6546  | 6867  | 103 | 2021.09.24 | 577 | 1180097 | 7116  | 36109 | 145 |
| 2020.10.31 | 249 | 241339 | 5753  | 6968  | 101 | 2021.09.25 | 578 | 1187773 | 7676  | 36230 | 121 |
| 2020.11.01 | 250 | 246663 | 5324  | 7067  | 99  | 2021.09.26 | 579 | 1194106 | 6333  | 36341 | 111 |
| 2020.11.02 | 251 | 250704 | 4041  | 7153  | 86  | 2021.09.27 | 580 | 1199761 | 5655  | 36450 | 109 |
| 2020.11.03 | 252 | 258437 | 7733  | 7273  | 120 | 2021.09.28 | 581 | 1210810 | 11049 | 36658 | 208 |
| 2020.11.04 | 253 | 267088 | 8651  | 7419  | 146 | 2021.09.29 | 582 | 1221636 | 10826 | 36865 | 207 |
| 2020.11.05 | 254 | 276802 | 9714  | 7540  | 121 | 2021.09.30 | 583 | 1233668 | 12032 | 37041 | 176 |
| 2020.11.06 | 255 | 287062 | 10260 | 7663  | 123 | 2021.10.01 | 584 | 1244555 | 10887 | 37210 | 169 |
| 2020.11.07 | 256 | 296999 | 9937  | 7793  | 130 | 2021.10.02 | 585 | 1257145 | 12590 | 37394 | 184 |
| 2020.11.08 | 257 | 303751 | 6752  | 7879  | 86  | 2021.10.03 | 586 | 1265827 | 8682  | 37544 | 150 |
| 2020.11.09 | 258 | 306991 | 3240  | 8009  | 130 | 2021.10.04 | 587 | 1274119 | 8292  | 37677 | 133 |
| 2020.11.10 | 259 | 314295 | 7304  | 8186  | 177 | 2021.10.05 | 588 | 1289156 | 15037 | 37929 | 252 |
| 2020.11.11 | 260 | 324094 | 9799  | 8389  | 203 | 2021.10.06 | 589 | 1303900 | 14744 | 38260 | 331 |
| 2020.11.12 | 261 | 334236 | 10142 | 8510  | 121 | 2021.10.07 | 590 | 1318367 | 14467 | 38542 | 282 |
| 2020.11.13 | 262 | 343725 | 9489  | 8684  | 174 | 2021.10.08 | 591 | 1332221 | 13854 | 38927 | 385 |
| 2020.11.14 | 263 | 353185 | 9460  | 8813  | 129 | 2021.10.09 | 592 | 1346240 | 14019 | 39209 | 282 |
| 2020.11.15 | 264 | 360281 | 7096  | 8926  | 113 | 2021.10.10 | 593 | 1356640 | 10400 | 39420 | 211 |
| 2020.11.16 | 265 | 365212 | 4931  | 9075  | 149 | 2021.10.11 | 594 | 1365788 | 9148  | 39629 | 209 |
| 2020.11.17 | 266 | 373474 | 8262  | 9261  | 186 | 2021.10.12 | 595 | 1382531 | 16743 | 40071 | 442 |
| 2020.11.18 | 267 | 383743 | 10269 | 9429  | 168 | 2021.10.13 | 596 | 1398264 | 15733 | 40461 | 390 |
| 2020.11.19 | 268 | 393851 | 10108 | 9596  | 167 | 2021.10.14 | 597 | 1414647 | 16383 | 40765 | 304 |
| 2020.11.20 | 269 | 403123 | 9272  | 9756  | 160 | 2021.10.15 | 598 | 1430475 | 15828 | 41130 | 365 |
| 2020.11.21 | 270 | 412808 | 9685  | 9916  | 160 | 2021.10.16 | 599 | 1445714 | 15239 | 41482 | 352 |
| 2020.11.22 | 271 | 418645 | 5837  | 10047 | 131 | 2021.10.17 | 600 | 1457260 | 11546 | 41781 | 299 |
| 2020.11.23 | 272 | 422852 | 4207  | 10177 | 130 | 2021.10.18 | 601 | 1467401 | 10141 | 42042 | 261 |
| 2020.11.24 | 273 | 430605 | 7753  | 10373 | 196 | 2021.10.19 | 602 | 1486264 | 18863 | 42616 | 574 |
| 2020.11.25 | 274 | 440344 | 9739  | 10541 | 168 | 2021.10.20 | 603 | 1503422 | 17158 | 43039 | 423 |
| 2020.11.26 | 275 | 449349 | 9005  | 10712 | 171 | 2021.10.21 | 604 | 1519532 | 16110 | 43487 | 448 |
| 2020.11.27 | 276 | 457848 | 8499  | 10884 | 172 | 2021.10.22 | 605 | 1534942 | 15410 | 43844 | 357 |
| 2020.11.28 | 277 | 465982 | 8134  | 11045 | 161 | 2021.10.23 | 606 | 1550203 | 15261 | 44290 | 446 |
| 2020.11.29 | 278 | 471536 | 5554  | 11193 | 148 | 2021.10.24 | 607 | 1561928 | 11725 | 44679 | 389 |
| 2020.11.30 | 279 | 475362 | 3826  | 11331 | 138 | 2021.10.25 | 608 | 1571115 | 9187  | 44980 | 301 |
| 2020.12.01 | 280 | 479634 | 4272  | 11530 | 199 | 2021.10.26 | 609 | 1587880 | 16765 | 45503 | 523 |
| 2020.12.02 | 281 | 484550 | 4916  | 11665 | 135 | 2021.10.27 | 610 | 1602830 | 14950 | 46015 | 512 |
| 2020.12.03 | 282 | 492211 | 7661  | 11876 | 211 | 2021.10.28 | 611 | 1616027 | 13197 | 46430 | 415 |
| 2020.12.04 | 283 | 500273 | 8062  | 12052 | 176 | 2021.10.29 | 612 | 1628501 | 12474 | 46911 | 481 |
| 2020.12.05 | 284 | 508345 | 8072  | 12186 | 134 | 2021.10.30 | 613 | 1640607 | 12106 | 47324 | 413 |
| 2020.12.06 | 285 | 513576 | 5231  | 12320 | 134 | 2021.10.31 | 614 | 1648031 | 7424  | 47751 | 427 |
| 2020.12.07 | 286 | 517236 | 3660  | 12447 | 127 | 2021.11.01 | 615 | 1655024 | 6993  | 48073 | 322 |
| 2020.12.08 | 287 | 524675 | 7439  | 12660 | 213 | 2021.11.02 | 616 | 1666097 | 11073 | 48664 | 591 |
| 2020.12.09 | 288 | 532040 | 7365  | 12821 | 161 | 2021.11.03 | 617 | 1676293 | 10196 | 49115 | 451 |
| 2020.12.10 | 289 | 539107 | 7067  | 12948 | 127 | 2021.11.04 | 618 | 1685264 | 8971  | 49604 | 489 |
| 2020.12.11 | 290 | 545567 | 6460  | 13116 | 168 | 2021.11.05 | 619 | 1693532 | 8268  | 50087 | 483 |
| 2020.12.12 | 291 | 551900 | 6333  | 13264 | 148 | 2021.11.06 | 620 | 1701589 | 8057  | 50482 | 395 |
| 2020.12.13 | 292 | 556335 | 4435  | 13385 | 121 | 2021.11.07 | 621 | 1706882 | 5293  | 50755 | 273 |
| 2020.12.14 | 293 | 559587 | 3252  | 13494 | 109 | 2021.11.08 | 622 | 1711137 | 4255  | 50996 | 241 |
| 2020.12.15 | 294 | 565758 | 6171  | 13698 | 204 | 2021.11.09 | 623 | 1718726 | 7589  | 51483 | 487 |
| 2020.12.16 | 295 | 571749 | 5991  | 13862 | 164 | 2021.11.10 | 624 | 1725017 | 6291  | 51888 | 405 |
| 2020.12.17 | 296 | 577446 | 5697  | 13969 | 107 | 2021.11.11 | 625 | 1730433 | 5416  | 52206 | 318 |
| 2020.12.18 | 297 | 582786 | 5340  | 14157 | 188 | 2021.11.12 | 626 | 1735277 | 4844  | 52513 | 307 |
| 2020.12.19 | 298 | 587944 | 5158  | 14296 | 139 | 2021.11.13 | 627 | 1739283 | 4006  | 52836 | 323 |
| 2020.12.20 | 299 | 591294 | 3350  | 14394 | 98  | 2021.11.14 | 628 | 1742304 | 3021  | 53069 | 233 |
| 2020.12.21 | 300 | 593783 | 2489  | 14481 | 87  | 2021.11.15 | 629 | 1744440 | 2136  | 53264 | 195 |
| 2020.12.22 | 301 | 598792 | 5009  | 14636 | 155 | 2021.11.16 | 630 | 1748568 | 4128  | 53661 | 397 |
| 2020.12.23 | 302 | 604251 | 5459  | 14766 | 130 | 2021.11.17 | 631 | 1752103 | 3535  | 54011 | 350 |
| 2020.12.24 | 303 | 608561 | 4310  | 14912 | 146 | 2021.11.18 | 632 | 1755179 | 3076  | 54343 | 332 |
| 2020.12.25 | 304 | 612373 | 3812  | 15023 | 111 | 2021.11.19 | 633 | 1758068 | 2889  | 54624 | 281 |

|            |     |        |      |       |     |            |     |         |      |       |     |
|------------|-----|--------|------|-------|-----|------------|-----|---------|------|-------|-----|
| 2020.12.26 | 305 | 613760 | 1387 | 15108 | 85  | 2021.11.20 | 634 | 1760765 | 2697 | 54838 | 214 |
| 2020.12.27 | 306 | 615809 | 2049 | 15230 | 122 | 2021.11.21 | 635 | 1762701 | 1936 | 54959 | 121 |
| 2020.12.28 | 307 | 618429 | 2620 | 15334 | 104 | 2021.11.22 | 636 | 1764251 | 1550 | 55113 | 154 |
| 2020.12.29 | 308 | 623066 | 4637 | 15469 | 135 | 2021.11.23 | 637 | 1766987 | 2736 | 55386 | 273 |
| 2020.12.30 | 309 | 627941 | 4875 | 15596 | 127 | 2021.11.24 | 638 | 1769783 | 2796 | 55617 | 231 |
| 2020.12.31 | 310 | 632263 | 4322 | 15767 | 171 | 2021.11.25 | 639 | 1771887 | 2104 | 55829 | 212 |
| 2021.01.01 | 311 | 636201 | 3938 | 15841 | 74  | 2021.11.26 | 640 | 1773845 | 1958 | 55989 | 160 |
| 2021.01.02 | 312 | 637395 | 1194 | 15919 | 78  | 2021.11.27 | 641 | 1775572 | 1727 | 56169 | 180 |
| 2021.01.03 | 313 | 640429 | 3034 | 15979 | 60  | 2021.11.28 | 642 | 1776949 | 1377 | 56275 | 106 |
| 2021.01.04 | 314 | 643559 | 3130 | 16057 | 78  | 2021.11.29 | 643 | 1778045 | 1096 | 56382 | 107 |
| 2021.01.05 | 315 | 648288 | 4729 | 16178 | 121 | 2021.11.30 | 644 | 1779667 | 1622 | 56529 | 147 |
| 2021.01.06 | 316 | 654007 | 5719 | 16299 | 121 | 2021.12.01 | 645 | 1780808 | 1141 | 56618 | 89  |
| 2021.01.07 | 317 | 658958 | 4951 | 16410 | 111 | 2021.12.02 | 646 | 1781957 | 1149 | 56684 | 66  |
| 2021.01.08 | 318 | 663799 | 4841 | 16506 | 96  | 2021.12.03 | 647 | 1783630 | 1673 | 56890 | 206 |
| 2021.01.09 | 319 | 668202 | 4403 | 16592 | 86  | 2021.12.04 | 648 | 1785120 | 1490 | 57021 | 131 |
| 2021.01.10 | 320 | 671284 | 3082 | 16654 | 62  | 2021.12.05 | 649 | 1786036 | 916  | 57099 | 78  |
| 2021.01.11 | 321 | 673271 | 1987 | 16725 | 71  | 2021.12.06 | 650 | 1786839 | 803  | 57153 | 54  |
| 2021.01.12 | 322 | 676968 | 3697 | 16881 | 156 | 2021.12.07 | 651 | 1788260 | 1421 | 57260 | 107 |
| 2021.01.13 | 323 | 681392 | 4424 | 16969 | 88  | 2021.12.08 | 652 | 1789539 | 1279 | 57360 | 100 |
| 2021.01.14 | 324 | 684917 | 3525 | 17035 | 66  | 2021.12.09 | 653 | 1790571 | 1032 | 57434 | 74  |
| 2021.01.15 | 325 | 688270 | 3353 | 17098 | 63  | 2021.12.10 | 654 | 1791502 | 931  | 57531 | 97  |
| 2021.01.16 | 326 | 691488 | 3218 | 17164 | 66  | 2021.12.11 | 655 | 1791502 | 0    | 57531 | 0   |
| 2021.01.17 | 327 | 693644 | 2156 | 17221 | 57  |            |     |         |      |       |     |

\*Additional data collected after this investigation [C], we hope it will be useful for those who intend to do further work.

In this work we will try to investigate only the first wave of Covid-19 spread as delimited and shown in Figure S1.

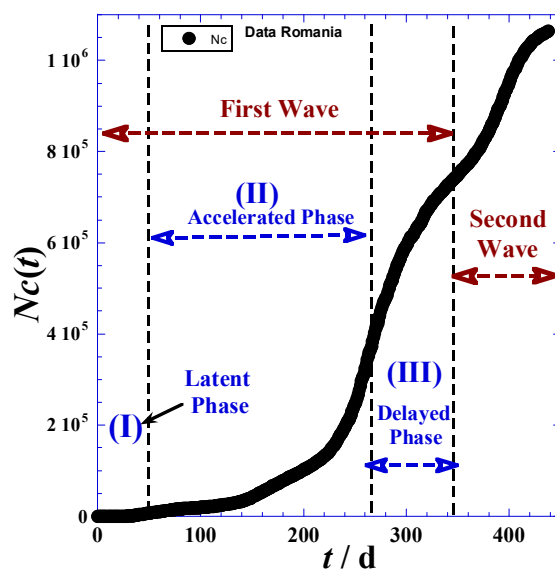

Figure S1. Total Reported Cases for the First 440 days of the Pandemic in Romania.

## 2S. Elimination of Duplicated Data

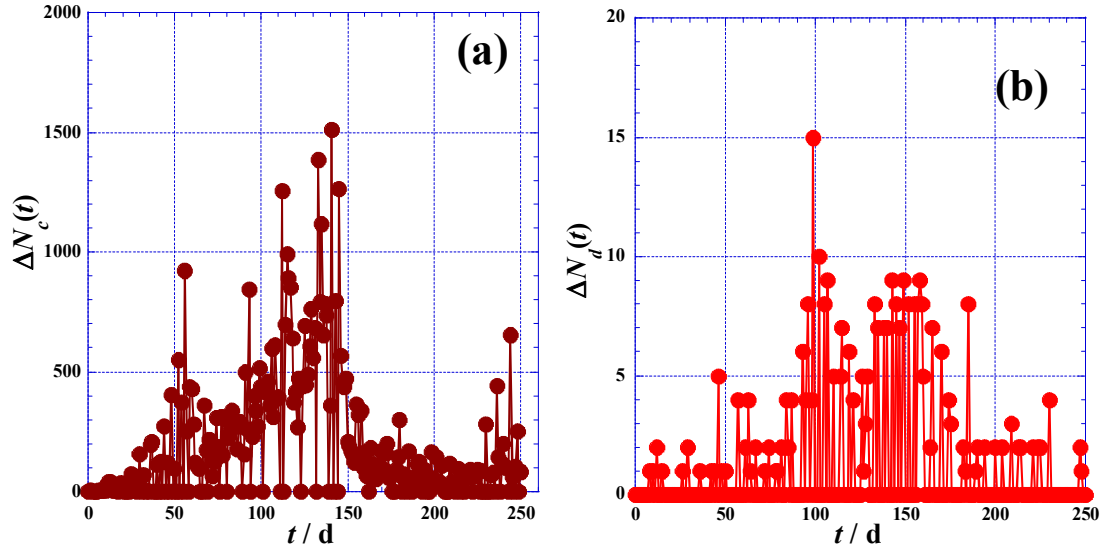

**Figure S2.** New daily reported cases (a) and new daily deaths (b) for the eight months of the pandemic in Romania (Reported from original data without smoothing of duplicated values).

Before investigations and data handling, we observe a certain difference in how countries record COVID-19 data due to the absence of accepted international standard for how they measure this information. In this context, this reflects the presence of duplicate information in the Excel sheet that is why we have suggested the flowchart for adjustment this duplicate data. We add that the several null values of new daily reported cases and deaths observed in the (Fig. S2) along the whole range of time) are due to the duplications of data. We assume the index ( $i$ ) is always the first duplicate data.

- ( $i-1$ ) the day before the duplicate data.
- ( $i+1$ ) is the day after the first duplicate data.
- We don't consider more than triple duplicate data.



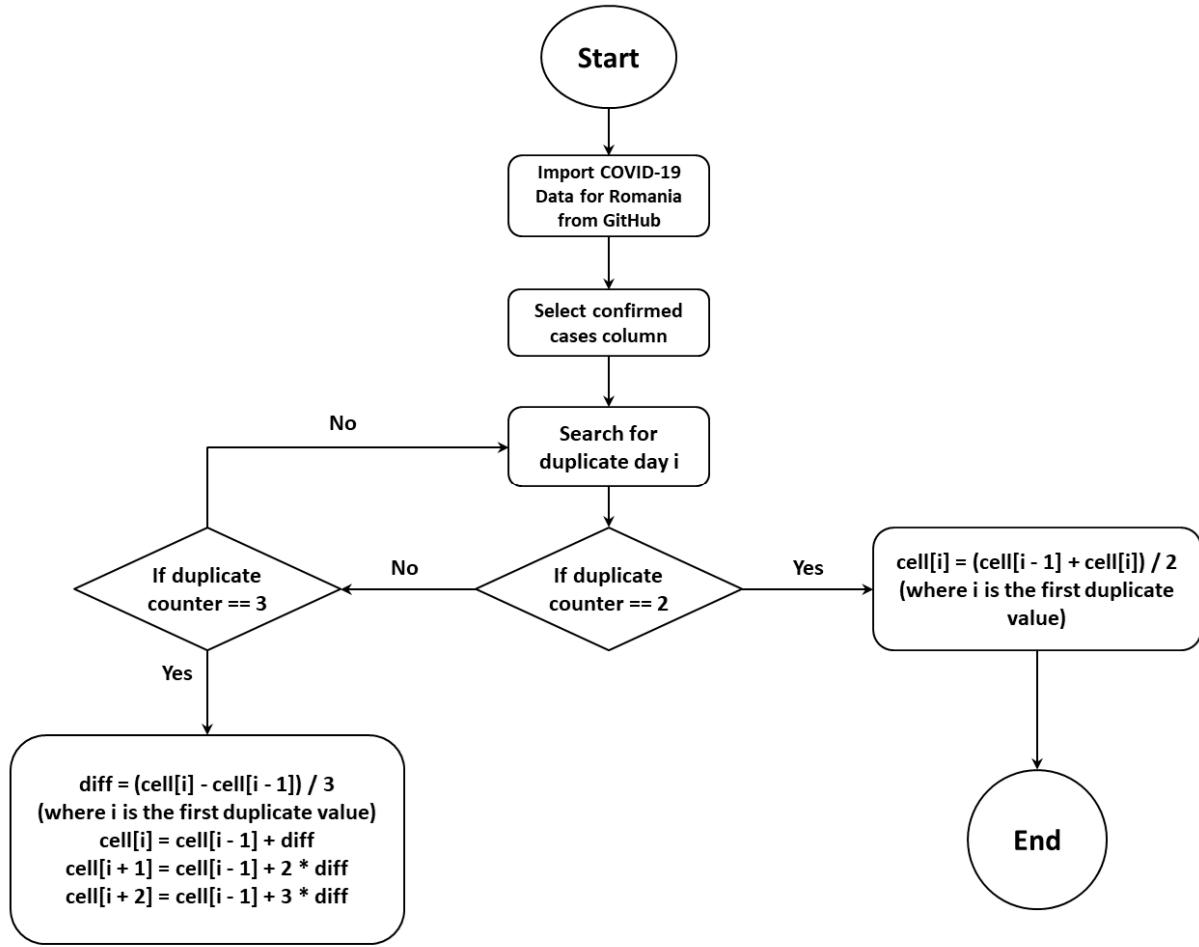

**Scheme S1.** Flowchart for Adjustment the Duplicate Data in Romania Excel Sheet.

### 3S.Determining Intervals of Concavity and Inflection Points

The tangents' technique implicates the use of graphical method in determining the inflection points. The method starts with drawing three straight lines: The first two lines referred to as the parallel tangents which are tangential to the curve on either side of the jump of  $N_c$  (or  $N_d$ ), the third line is parallel to aforementioned tangents and equidistant to each of them. The third line will approximately tend to intersect the curve at the midpoint of the jump of  $N_c$  (or  $N_d$ ), where the coordinates of this intersection point (Figs. S3 and S4) will correspond to the coordinates of the inflection point  $F_c(t_{c1}, N_{c1})$  or  $F_d(t_{d1}, N_{d1})$ .

It is perceptible that the inflection point is the point where there is a change in concavity (Fig. 1). The method of determining the intervals of concavity is same as the method used to determine the intervals of increase/decrease as shown in Fig. 2, except that the second derivative is used in place of the first derivative (Fig. 4S). More precisely, as  $d(dN/dt).dt = d^2N/dt^2$ , the intervals of increase/decrease for the first derivative in Fig. 2 will determine the concavity of  $N(t)$ . The two extrema of Figure S4 indicate approximately, where the two tangent lines are positioned as optimal positions.

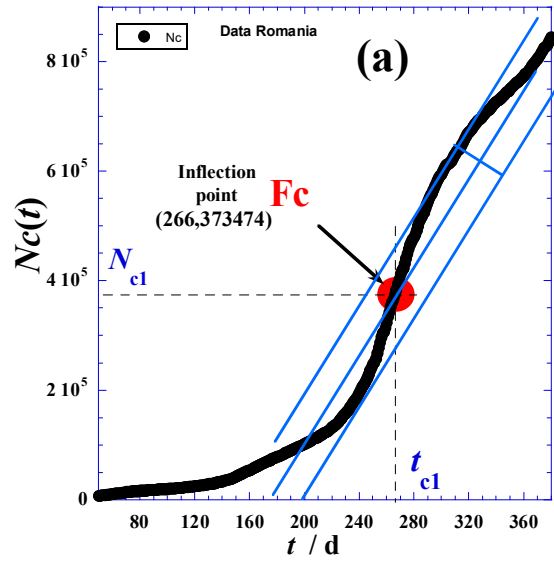

**Figure S3a.** Graphical determination of the inflection point  $F_c(t_{c1}, N_{c1})$  related the total reported cases  $N_c(t)$  for the first 350 days in Romania.

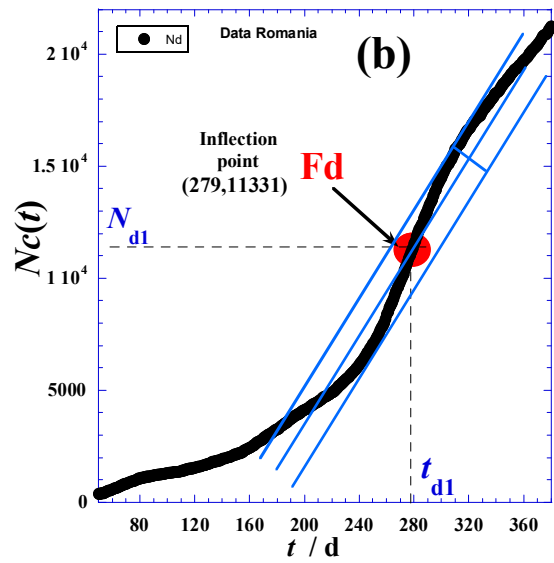

**Figure S3b.** Graphical determination of the inflection point  $F_d(t_{d1}, N_{d1})$  related the total death cases  $N_d(t)$  for the first 350 days in Romania.

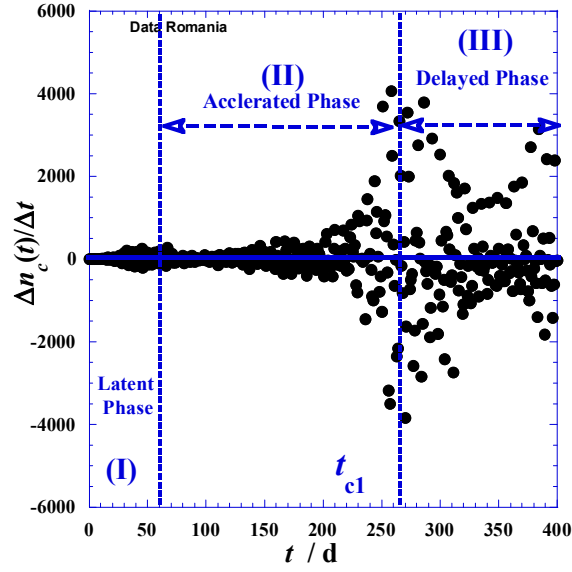

**Figure S4.** Second derivative function ( $d^2N_c/dt^2$ ) related the total death cases  $N_c(t)$  for the first 400 days in Romania.

Here, there are some aberrant values (with opposite sign) due to fluctuations and double derivative operations. In addition, the existence of some small waves disturbs the trend of points

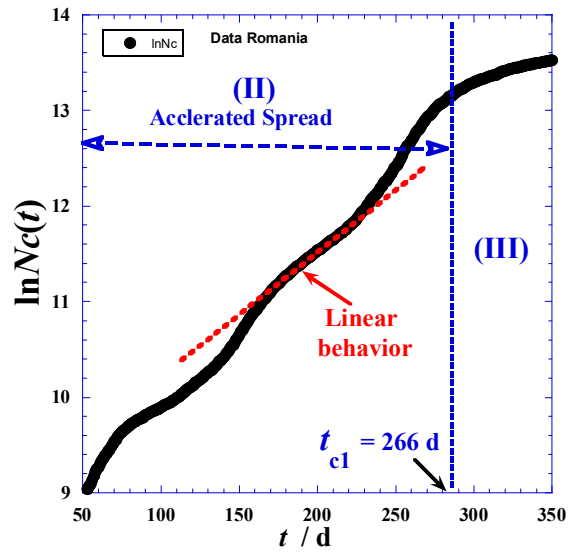

**Figure S5.** Natural logarithm of total reported cases  $\ln N_c(t)$  with time in the accelerated phase (II).

Note, we observe other zones of linear behavior in the center of accelerated phase, because there are secondary small waves indicated by the Figure 3.

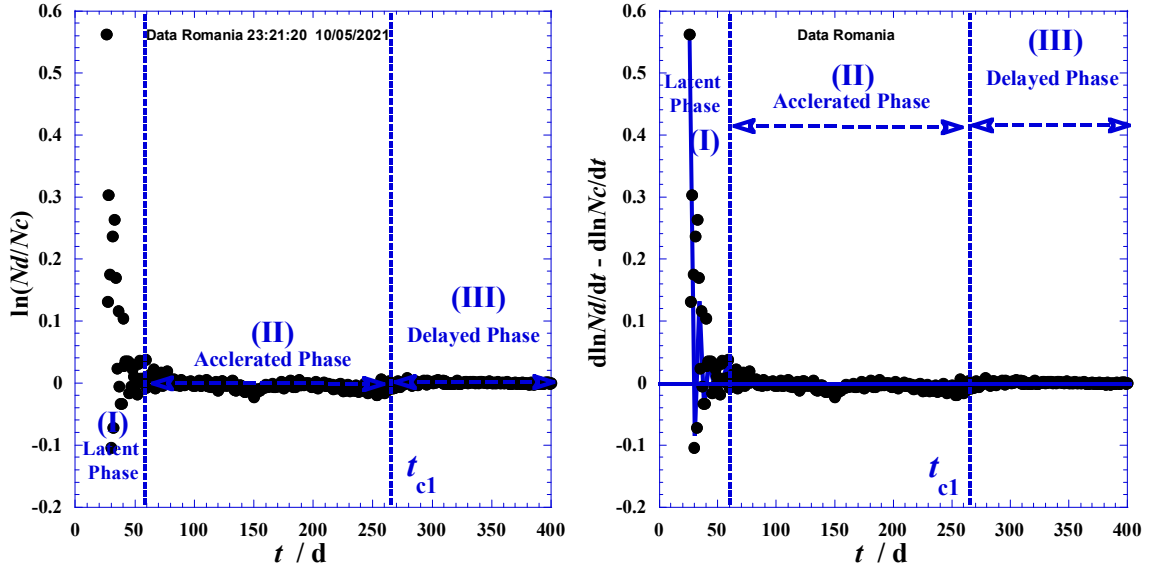

**Figure S6.** Difference between logarithms of the derivative functions of the total reported cases and deaths; to confirm the global maximum occurring  $\ln N_c.N_d$ -Curve (Figure 5).

Due to perturbations in data of scatter points, we cannot see clearly where this function cuts the time axis. Nevertheless, we are sure that on approximately the time ( $t = t_{c1}$ ) must cut the zero for the highly day illustrated by the inflection point in Fig. 1 and a maximum in Fig. 2. In the same context, we can predict the final value of the ratio  $N_d.N_c$  of Fig. 5 in the case of symmetric behavior by the following expression:

$$\lim_{\infty} \frac{N_d(t)}{N_c(t)} = \frac{N_{d0}}{N_{c0}} e^{\frac{t_c}{\tau_c} - \frac{t_d}{\tau_d}} \quad (S1)$$
